# Supplementary material for: MicroRNA-22 Regulates the Pro-inflammatory Responses and M1 Polarization of Macrophages by Targeting GLUT1 and 4-1BBL
Source: Hindawi journal article supplement (doi:10.1155/2023/2457006), 2023-07-10
Supplement: f2 [file 2457006.f2.pdf]

# Supplementary Figure 1

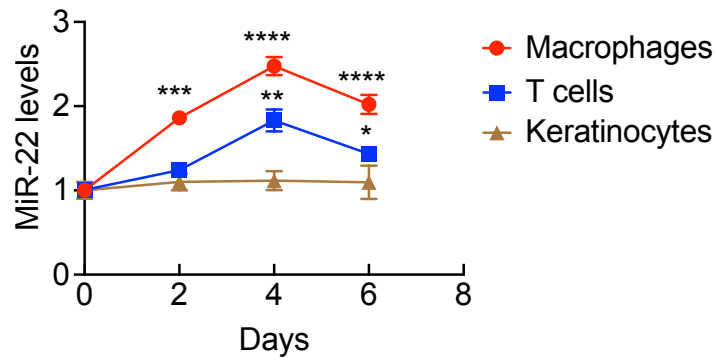

**Supplementary Figure 1.** Induction of miR-22 in immune cells and keratinocytes in IMQ-treated mice. Macrophages, T cells and keratinocytes were prepared from the skin tissues of IMQ-treated mice at the indicated times, and the levels of miR-22 was measured by qPCR analysis. Data are shown as mean  $\pm$  SD. N = 3, \* $p$  < 0.05, \*\* $p$  < 0.01, \*\*\* $p$  < 0.005, \*\*\*\* $p$  < 0.001. RNA samples were collected and analyzed in our previous study (Miki, H. et al. *J Immunol.* **204**, 1892-1903 (2020)).
